# Supplementary material for: Identification and prediction of immune checkpoint inhibitors-related pneumonitis by machine learning
Source: PubMed Central journal article supplement (PMC10338954; doi:10.3389/fimmu.2023.1138489), 2023-06-29
Supplement: DataSheet_1.pdf [file DataSheet_1.pdf]

## *Supplementary Material*

# Identification and prediction of immune checkpoint inhibitors-related pneumonitis by machine learning

Li Gong<sup>1†</sup>, Jun Gong<sup>2†</sup>, Xin Sun<sup>3</sup>, Lin Yu<sup>3</sup>, Bin Liao<sup>1</sup>, Xia Chen<sup>4\*</sup>, Yong-sheng Li<sup>1\*</sup>

\* Correspondence:

Xia Chen (kathleentj@cqu.edu.cn)

Yongsheng Li ([lys@cqu.edu.cn](mailto:lys@cqu.edu.cn))

### 1 Supplemental Appendix 1

**Table S1. Data dictionary of variables.**

|             | Variable name                 | Type(units)        | Description                                             |
|-------------|-------------------------------|--------------------|---------------------------------------------------------|
| outcome     | IRP                           | categorical/factor | IRP status (2 levels): <i>IRP</i> , <i>Non-IRP</i>      |
| demographic | Sex                           |                    | biological sex (2 levels) : <i>Male</i> , <i>Female</i> |
|             | Age(y)                        | numeric (years)    | age >=18                                                |
|             | BMI                           | numeric            |                                                         |
|             | Body Temperature              | numeric(°C )       |                                                         |
|             | Systolic blood pressure       | numeric            |                                                         |
|             | Diastolic blood pressure      | numeric            |                                                         |
|             | Smoking (yes)                 | categorical/factor |                                                         |
|             | Drinking (yes)                | categorical/factor |                                                         |
|             | KPS score                     | numeric            |                                                         |
|             | Cancer stage                  | categorical/factor | (4 levels): I , II , III , IV                           |
|             | Number of underlying diseases |                    |                                                         |
|             | History of lung diseases      |                    |                                                         |

|             |                                            |                    |                                                                                                                           |
|-------------|--------------------------------------------|--------------------|---------------------------------------------------------------------------------------------------------------------------|
| Treatment   | ICIs drugs                                 |                    | (8 levels):<br><i>Attilizumab, Carrilizumab, Tirelizumab, Nevirumab, Perbolizumab, Toripalimab, Sindillizumab, others</i> |
|             | ICIs drug dosage                           | numeric(mg)        |                                                                                                                           |
|             | First time for immunotherapy               | categorical/factor | (2 levels): <i>yes, no</i>                                                                                                |
|             | Course of cancer treatment                 | count              |                                                                                                                           |
|             | Number of other antitumor drugs            | count              |                                                                                                                           |
|             | Number of non-antitumor drugs              | count              |                                                                                                                           |
|             | Surgery                                    | categorical/factor | (2 levels): <i>yes, no</i>                                                                                                |
|             | History of radiation therapy               | categorical/factor | (2 levels): <i>yes, no</i>                                                                                                |
|             | History of chemotherapy                    | categorical/factor | (2 levels): <i>yes, no</i>                                                                                                |
|             | Number of previous anti-tumor drugs        | count              |                                                                                                                           |
| lab results | CD4 <sup>+</sup> lymphocyte count          | numeric            |                                                                                                                           |
|             | Percentage of CD4 <sup>+</sup> lymphocytes | numeric            |                                                                                                                           |
|             | CD8 <sup>+</sup> lymphocyte count          | numeric            |                                                                                                                           |
|             | Percentage of CD8 <sup>+</sup> lymphocytes | numeric            |                                                                                                                           |
|             | T lymphocyte count                         | numeric            |                                                                                                                           |
|             | Percentage of T lymphocytes                | numeric            |                                                                                                                           |
|             | B lymphocyte count                         | numeric            |                                                                                                                           |
|             | Percentage of B lymphocytes                | numeric            |                                                                                                                           |
|             | NK cell count                              | numeric            |                                                                                                                           |
|             | Percentage of NK cell                      | numeric            |                                                                                                                           |
|             | Red blood cell                             | numeric            |                                                                                                                           |
|             | Hemoglobin                                 | numeric            |                                                                                                                           |
|             | Hemameba                                   | numeric            |                                                                                                                           |
|             | Percentage of lymphocytes                  | numeric            |                                                                                                                           |
|             | Percentage of monocytes                    | numeric            |                                                                                                                           |
|             | Percentage of neutrophilic granulocyte     | numeric            |                                                                                                                           |
|             | Percentage of eosinophils                  | numeric            |                                                                                                                           |

|  |                         |         |  |
|--|-------------------------|---------|--|
|  | Percentage of basophils | numeric |  |
|  | Blood platelet          | numeric |  |

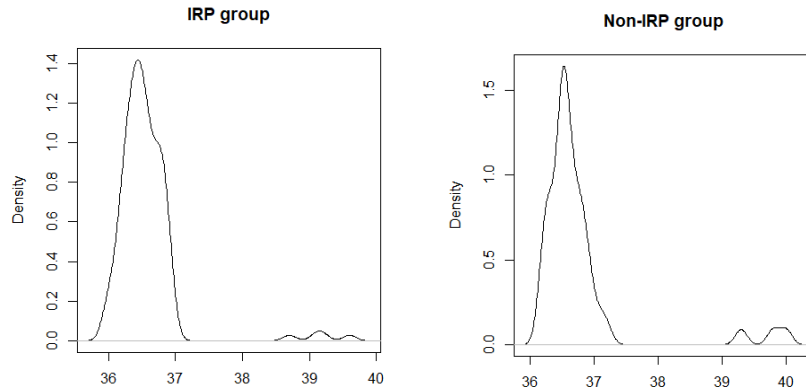

**Figure S1. The body temperature distributions between IRP and non-IRP groups**

**Table S2. Baseline variable comparisons.**

|                                            | IRP (n=48)                 | Non-IRP (N=142)            | P value |
|--------------------------------------------|----------------------------|----------------------------|---------|
| CD4 <sup>+</sup> lymphocyte count          | 402.50<br>[269.00, 624.75] | 462.50<br>[292.50, 673.75] | 0.494   |
| Percentage of CD4 <sup>+</sup> lymphocytes | 34.45 [28.33, 41.30]       | 37.10 [28.90, 45.30]       | 0.250   |
| CD8 <sup>+</sup> lymphocyte count          | 343.00 [191.50, 439.25]    | 300.50 [228.00, 432.50]    | 0.631   |
| Percentage of CD8 <sup>+</sup> lymphocytes | 25.75 [20.68, 33.00]       | 25.05 [20.00, 33.85]       | 0.630   |
| T lymphocyte count                         | 799.50 [559.75, 1160.50]   | 830.00 [592.00, 1134.00]   | 0.908   |
| Percentage of T lymphocytes                | 67.55 [60.08, 78.30]       | 69.80 [59.90, 77.20]       | 0.528   |
| B lymphocyte count                         | 99.00 [57.75, 185.00]      | 130.00 [66.00, 197.00]     | 0.464   |
| Percentage of B lymphocytes                | 8.85 [5.93, 13.15]         | 9.30 [6.50, 13.50]         | 0.491   |

## Supplementary Material

|                                        |                            |                            |              |
|----------------------------------------|----------------------------|----------------------------|--------------|
| NK cell count                          | 218.00 [157.00, 330.00]    | 236.00 [127.00, 339.00]    | 0.829        |
| Percentage of NK cell                  | 20.50 [11.80, 32.80]       | 19.30 [13.00, 24.40]       | 0.298        |
| Interleukin-2                          | 565.00<br>[487.00, 654.00] | 477.50<br>[385.00, 685.75] | 0.355        |
| Interleukin-6                          | 3.98 [2.53, 12.00]         | 7.18 [4.70, 14.83]         | 0.163        |
| Interleukin-8                          | 16.00 [12.40, 21.90]       | 29.65 [13.03, 91.62]       | 0.067        |
| Interleukin-10                         | 5.00 [5.00, 5.00]          | 5.00 [5.00, 5.00]          | 0.350        |
| Tumor necrosis factor $\alpha$         | 9.33 [8.50, 10.60]         | 9.32 [7.39, 14.05]         | 0.865        |
| Red blood cell                         | 4.20 [3.85, 4.72]          | 4.11 [3.59, 4.56]          | 0.357        |
| Hemoglobin                             | 127.00<br>[113.00, 138.00] | 123.00<br>[111.00, 140.00] | 0.903        |
| Hemameba                               | 5.92 [5.14, 7.07]          | 6.15 [4.80, 7.85]          | 0.689        |
| Percentage of lymphocytes              | 19.20 [12.30, 23.90]       | 20.30 [15.20, 25.80]       | 0.277        |
| Percentage of monocytes                | 9.10 [7.20, 11.70]         | 8.20 [6.65, 11.15]         | 0.355        |
| Percentage of neutrophilic granulocyte | 67.30 [59.00, 81.50]       | 67.30 [60.30, 72.75]       | 0.604        |
| Percentage of eosinophils              | 1.60 [0.60, 3.60]          | 2.10 [1.25, 3.50]          | 0.134        |
| Percentage of basophils                | 0.50 [0.20, 0.60]          | 0.50 [0.30, 0.70]          | 0.09         |
| Blood platelet                         | 226.00<br>[186.00, 279.00] | 213.00<br>[162.00, 286.50] | 0.961        |
| Partial pressure of carbon dioxide     | 42.00 [39.25, 44.00]       | 44.00 [41.00, 48.00]       | <b>0.009</b> |
| Oxygen partial pressure                | 83.50 [74.75, 98.75]       | 79.00 [72.00, 89.00]       | 0.170        |

|                          |                      |                      |       |
|--------------------------|----------------------|----------------------|-------|
| HCO                      | 25.35 [22.73, 27.12] | 26.60 [25.40, 28.80] | 0.002 |
| SBC                      | 24.90 [23.80, 26.40] | 26.30 [25.10, 27.30] | 0.015 |
| Oxyhemoglobin saturation | 97.00 [97.00, 97.00] | 95.00 [94.00, 97.00] | 0.416 |
| BE                       | -1.20 [-1.20, -1.20] | 1.90 [0.20, 3.10]    | 0.139 |
| Whole blood lactic acid  | 1.30 [1.30, 1.30]    | 1.90 [1.50, 2.40]    | 0.245 |
| PH                       | 7.40 [7.37, 7.43]    | 7.40 [7.37, 7.42]    | 0.494 |

## 2 Supplemental appendix 2

**Table S3. A summary of missingness.**

| No. | Variable Name                               | Count | Percentage (%) |
|-----|---------------------------------------------|-------|----------------|
| 1   | TMB                                         | 176   | 91.67          |
| 2   | PH value                                    | 141   | 73.44          |
| 3   | BE                                          | 138   | 71.88          |
| 4   | Whole blood lactic acid                     | 138   | 71.88          |
| 5   | Partial pressure of carbon dioxide          | 119   | 61.98          |
| 6   | Interleukin-2                               | 110   | 57.29          |
| 7   | Oxygen partial pressure                     | 101   | 52.60          |
| 8   | HCO                                         | 101   | 52.60          |
| 9   | SBC                                         | 101   | 52.60          |
| 10  | Oxyhemoglobin saturation                    | 101   | 52.60          |
| 11  | Interleukin-6                               | 100   | 52.08          |
| 12  | Interleukin-8                               | 100   | 52.08          |
| 13  | Interleukin-10                              | 100   | 52.08          |
| 14  | Tumor necrosis factor $\alpha$              | 100   | 52.08          |
| 15  | CD4 <sup>+</sup> lymphocyte count(baseline) | 31    | 16.15          |
| 16  | Number of non-antitumor drugs               | 27    | 14.21          |
| 17  | CD8 lymphocyte count                        | 24    | 12.50          |
| 18  | Percentage of CD8 <sup>+</sup> lymphocytes  | 24    | 12.50          |

---

|    |                                        |    |       |
|----|----------------------------------------|----|-------|
| 19 | CD4 <sup>+</sup> lymphocyte count      | 24 | 12.50 |
| 20 | T lymphocyte count                     | 23 | 11.98 |
| 21 | Percentage of T lymphocytes            | 23 | 11.98 |
| 22 | B lymphocyte count                     | 23 | 11.98 |
| 23 | Percentage of B lymphocytes            | 23 | 11.98 |
| 24 | NK cell count                          | 23 | 11.98 |
| 25 | Percentage of NK cell                  | 23 | 11.98 |
| 26 | Red blood cell                         | 13 | 6.77  |
| 27 | ICIs drug dosage (mg)                  | 12 | 6.25  |
| 28 | Number of previous anti-tumor drugs    | 10 | 5.26  |
| 29 | Hemoglobin                             | 8  | 4.17  |
| 30 | Hemameba                               | 8  | 4.17  |
| 31 | Percentage of lymphocytes              | 8  | 4.17  |
| 32 | Percentage of monocytes                | 8  | 4.17  |
| 33 | Percentage of neutrophilic granulocyte | 8  | 4.17  |
| 34 | Percentage of eosinophils              | 8  | 4.17  |
| 35 | Percentage of basophils                | 8  | 4.17  |
| 36 | Blood platelet                         | 8  | 4.17  |
| 37 | Surgery                                | 6  | 3.12  |
| 38 | History of radiation therapy           | 6  | 3.12  |
| 39 | Course of cancer treatment             | 4  | 2.08  |
| 40 | BMI                                    | 3  | 1.56  |
| 41 | Systolic blood pressure                | 2  | 1.04  |
| 42 | Diastolic blood pressure               | 2  | 1.04  |
| 43 | KPS score                              | 2  | 1.04  |
| 44 | Temperature (°C)                       | 1  | 0.52  |
| 45 | Cancer stage                           | 1  | 0.52  |
| 46 | Number of other antitumor drugs        | 1  | 0.52  |
| 47 | Sex                                    | 0  | 0.00  |
| 48 | Age(y)                                 | 0  | 0.00  |
| 49 | Smoking                                | 0  | 0.00  |
| 50 | Drinking                               | 0  | 0.00  |

---

|    |                               |   |      |
|----|-------------------------------|---|------|
| 51 | Number of underlying diseases | 0 | 0.00 |
| 52 | History of lung diseases      | 0 | 0.00 |
| 53 | ICIs drugs                    | 0 | 0.00 |
| 54 | First time for immunotherapy  | 0 | 0.00 |
| 55 | History of chemotherapy       | 0 | 0.00 |

*Note: variables with missingness larger than 15% were removed from the analysis.*

### 3 Supplemental appendix 3

#### Modelling process

#### 3.1 Pre-processing

Before modeling, we imputed missing data using the mode or median given none of the continuous predictors was normally distributed. we checked multicollinearity among the continuous candidate predictors using correlation (Pearson) function in R. we noticed five predictors with sparse distributions (shown in Figure S2), thus we grouped them to categorical variables, the mapping relationship is shown in Table 1. We also created dummy variables for categorical predictors with more than 2 levels.

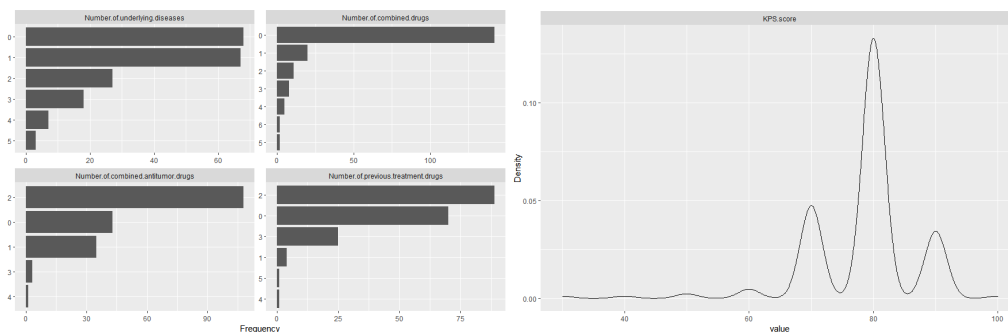

**Figure S2. Sparse distributions of number of underlying disease, number of previous antitumor drugs, number of non-antitumor drugs, number of other antitumor drugs and KPS score.**

**Table S4. The categorical of predictors.**

| Predictor name               | Original data type | Working data type                 |
|------------------------------|--------------------|-----------------------------------|
| Number of underlying disease | count              | categorical; 3 levels (0, 1, >=2) |

|                                    |            |                                                     |
|------------------------------------|------------|-----------------------------------------------------|
| Number of previous antitumor drugs | count      | categorical; 2 levels (Yes/No)                      |
| Number of non-antitumor drugs      | count      | categorical; 2 levels (Yes/No)                      |
| Number of other antitumor drugs    | count      | categorical; 2 levels (Yes/No)                      |
| KPS score                          | continuous | categorical; 3 levels ( $\leq 70$ ; 80; $\geq 90$ ) |

---

### 3.2 Training-validation-test framework

We used stratified sampling to divide the working dataset into two parts: training and test sets (with a ratio of 8:2), where the test set is used to mimic an external data for external validation. The training set will be further divided into training and validation sets using cross-validation framework to allow interval validation.

### 3.3 Modelling

Risk prediction models were built using the training set. Specifically, the training set was randomly partitioned into three roughly equal size parts, we then left out one part as the validation set and model was built on the remaining parts. The leave-out-modelling process was conducted recursively until each part was treated as validation set for once. The cross-validation modelling process was repeated for 10 times. Therefore, the number of training samples is 10 times that of the original training set. We Tuned one hundred combinations of hyperparameters, where we specified ten different alphas: 0.1,0.2,0.3, 0.4,...,1.0, and ten different lambdas: 0.000171526, 0.000396247, 0.000915382, 0.002114651, 0.004885118, 0.011285256, 0.026070404, 0.060226016, 0.139129907.

### 3.4 Performance Evaluation

Performance matrices including Scaled brier score, AUC, AP and Spiegelhalter-z statistics were computed for the validation and test sets respectively. The confidence interval of AUC was computed using bootstrapping method.

**Table S5 Intercept coefficients of final prediction model**

| Variable name                        | Coefficient |
|--------------------------------------|-------------|
| Intercept                            | -1.474      |
| KPS score $\leq 70$                  | 0.530       |
| Cancer stage =IV                     | -0.196      |
| History of antitumor therapy(yes/no) | 0.048       |
| Percentage of CD4+ lymphocytes       | -0.011      |
| Hemoglobin                           | -0.011      |
| NSCLC(yes/no)                        | 1.265       |
| Body temperature                     | 0.027       |
| History of lung diseases(yes/no)     | -2.310      |



|                                       |        |
|---------------------------------------|--------|
| Tirelizumab(yes/no)                   | -1.036 |
| Sindillizumab(yes/no)                 | -2.122 |
| Number of underlying disease $\geq 2$ | 1.690  |
